# Supplementary material for: The relationship between the structure and functionality of essential PUFA delivery systems based on sodium caseinate with phosphatidylcholine liposomes without and with a plant antioxidant: an in vitro and in vivo study
Source: Royal Society of Chemistry journal article supplement (doi:10.1039/d1fo03336k), 2022-01-01
Supplement: d1fo03336k1.pdf [file d1fo03336k1.pdf]

## **The relationship between the structure and functionality of the essential PUFA delivery systems based on sodium caseinate with phosphatidylcholine liposomes without and with a plant antioxidant: an in vitro and in vivo study**

Maria G. Semenova,\* Anna S. Antipova, Elena I. Martirosova, Sergey A. Chebotarev, Nadezhda P. Palmina, Natalya G. Bogdanova, Natalya I. Krikunova, Daria V. Zelikina, Maria S. Anokhina, Valery V. Kasparov

*Emanuel Institute of Biochemical Physics of Russian Academy of Sciences, Russian Federation.*

### **Methods**

#### **Estimation of the efficiency of the encapsulation of the liposomes PC–FO or PC–FO–EOC by SC**

Aliquots (3 ml) of diethyl ether were added to the glass vials containing 5 ml of either the pure liposomes (PC–FO, PC–FO–EOC) or their complexes with SC. It is important to note here that the concentrations of the pure liposomes were equal to their concentrations in the solutions of the complexes in all experiments, including *in vitro* modeling of their digestion in GIT. All the vials were shaken gently, conditioned at room temperature for 30 min and then placed in a fridge at 7 °C for the extraction during 24 hours. The concentrations of free lipids in the samples were estimated spectrophotometrically (SF-2000, UKB Spectrum, Russia) by measuring the absorbance ( $A$ ) of the diethyl ether extracts against a pure diethyl ether, as a blank, at  $\lambda = 210\text{--}215$  nm.<sup>1-3</sup> The efficiency of the encapsulation of the liposomes PC–FO and PC–FO–EOC by SC was calculated by the following equation:

$$E = 100 \times (A_{\text{initial}} - A_{\text{free}}) / A_{\text{initial}} \quad (1)$$

where  $E$  is the efficiency of the lipid encapsulation in %;  $A_{\text{initial}}$  are the absorbance values for the diethyl ether extracts from the aqueous solutions of the pure liposomes either PC–FO or PC–FO–EOC. These values have been taken as 100%;  $A_{\text{free}}$  are the absorbance values for the diethyl ether extracts from the aqueous solutions of the complexes SC–PC–FO and SC–PC–FO–EOC.

The results presented in this work were the average of at least of the three independent experiments. The estimated experimental error of the efficiency of the encapsulation by this method was not more than  $\pm 10\%$ .

## References

- 1 E. Angioni, G. Lercker, N. G. Frega, G. Carta, M. P. Melis, E. Murru, S. Spada, S. Banni, UV spectral properties of lipids as a tool for their identification, *Eur. J. Lipid Sci. Technol.*, 2002, 104 (1), 59-64.
- 2 D. O. Forcato, M. P. Carmine, G. E. Echeverria, R. P. Pécora, S.C. Kivatinitz, Milk fat content measurement by a simple UV spectrophotometric method: An alternative screening method, *Int. J. Dairy Sci.*, 2005, 88, 478–481.
- 3 M. C. Dos Santos, T. Kroetz, C. L. Dora, F. C. Giacomelli, T. E. A. Frizon, C. T. Pich, L. da Silva Pinto, A. S. Soares, F. S. Rodembusch, V. R. de Lima, A. G. Dal-Bó, Elucidating Bauhinia variegata lectin/phosphatidylcholine interactions in lectin-containing liposomes, *J. Colloid Interface Sci.*, 2018, 519, 232–241.
