# Supplementary material for: The relationship between the structure and functionality of essential PUFA delivery systems based on sodium caseinate with phosphatidylcholine liposomes without and with a plant antioxidant: an in vitro and in vivo study
Source: Royal Society of Chemistry journal article supplement (doi:10.1039/d1fo03336k), 2022-01-01
Supplement: d1fo03336k4.pdf [file d1fo03336k4.pdf]

## ESI-4

### The relationship between the structure and functionality of the essential PUFA delivery systems based on sodium caseinate with phosphatidylcholine liposomes without and with a plant antioxidant: an in vitro and in vivo study

Maria G. Semenova,\* Anna S. Antipova, Elena I. Martirosova, Sergey A. Chebotarev, Nadezhda P. Palmina, Natalya G. Bogdanova, Natalya I. Krikunova, Daria V. Zelikina, Maria S. Anokhina, Valery V. Kasparov

*Emanuel Institute of Biochemical Physics of Russian Academy of Sciences, Russian Federation.*

**Fig. S1 Scheme of the enzymatic elongation and desaturation of essential fatty acids of the n-3 and n-6 families.<sup>1</sup>**

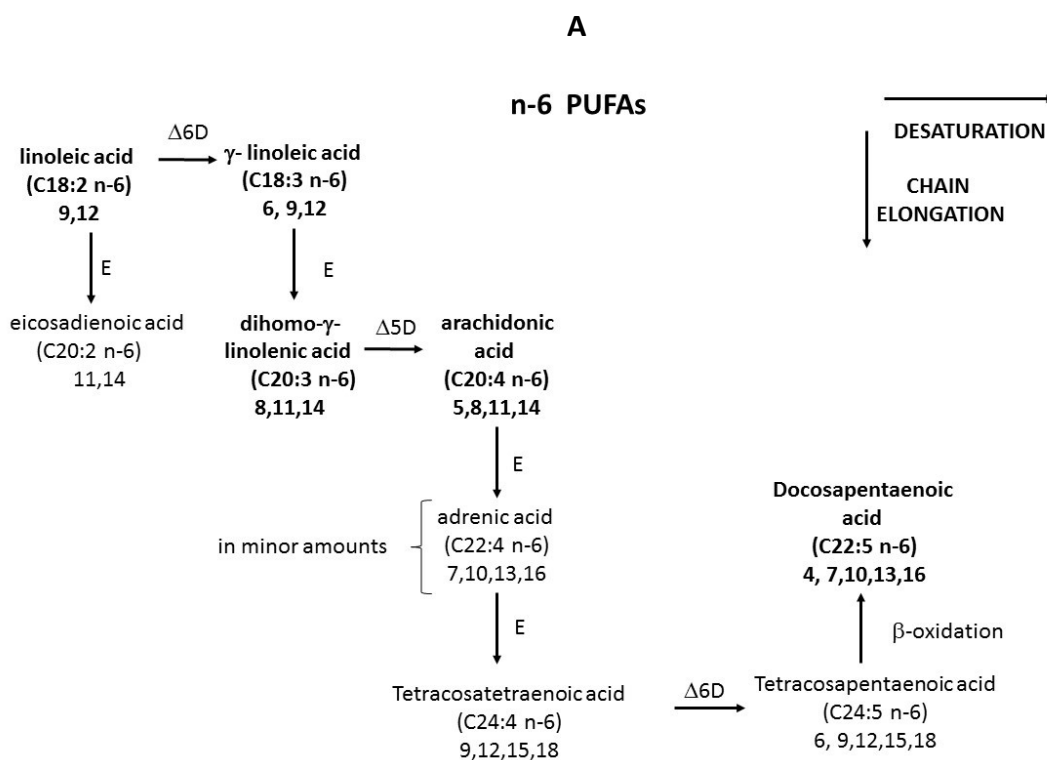

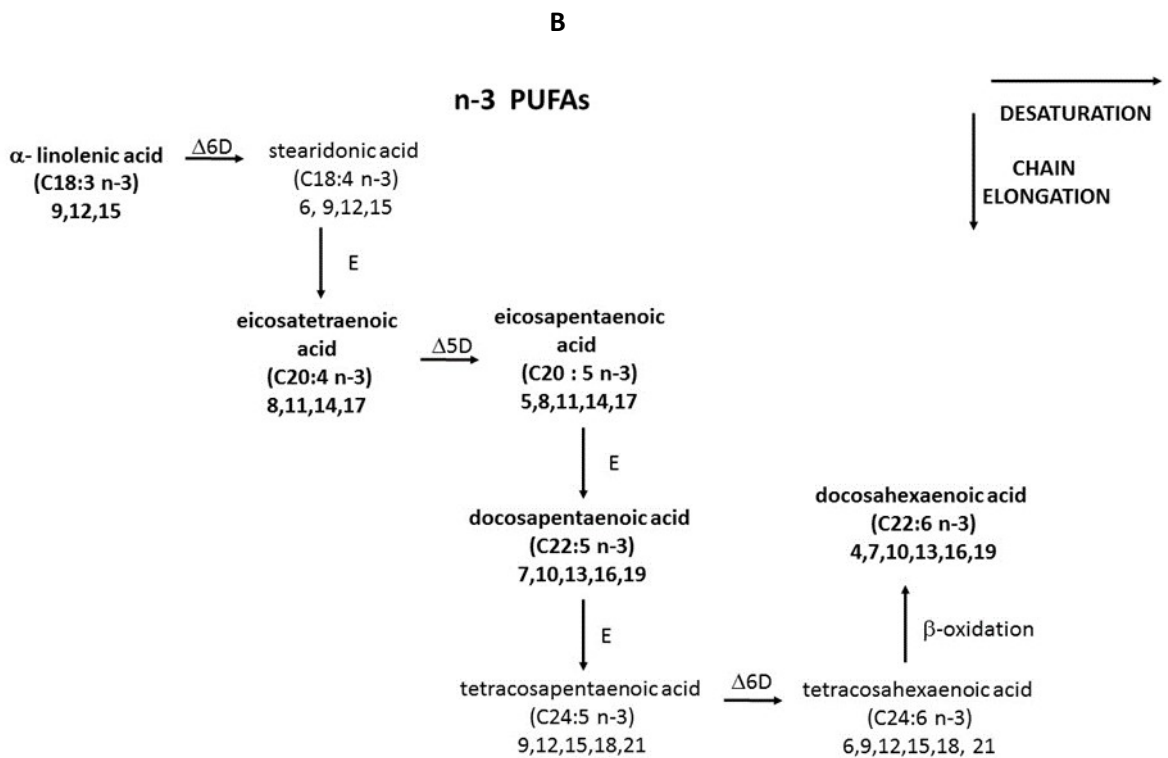

In human tissues these pathways are rather slow.<sup>1</sup>

## References

1 E. Tvrzicka, L-S. Kremmyda, B. Stankova and A. Zak, Fatty acids as biocompounds: their role in human metabolism, health and disease – a review, Part 1: classification, dietary sources and biological functions, *Biomed. Pap. Med. Fac. Univ. Palacky Olomouc Czech. Repub.*, 2011, 155(2), 117-130.
